# Supplementary material
Source: PubMed Central journal article supplement (PMC6193540)
Supplement: NIHMS79320-supplement-Supplementary_Tables.pdf [file NIHMS79320-supplement-Supplementary_Tables.pdf]

## Supplementary Table S1

| Case <sup>‡</sup> | Gender <sup>a</sup> | Smoking status | Alcohol status <sup>b</sup> | Type      | Site        | Sub-site <sup>c</sup> | T <sup>d</sup> | N <sup>e</sup> | M <sup>f</sup> | R <sup>g</sup> | P16 <sup>h</sup> |
|-------------------|---------------------|----------------|-----------------------------|-----------|-------------|-----------------------|----------------|----------------|----------------|----------------|------------------|
| 1                 | M                   | Previous       | X                           | Primary   | Hypopharynx | Pyriiform fossa       | 3              | 2b             | 0              | Y              | -                |
| 2                 | M                   | Current        | Current                     | Primary   | Oral        | Floor of mouth        | 2              | 2c             | 0              | N              | -                |
| 3                 | F                   | Current        | Current                     | Primary   | Larynx      | N/A                   | 3              | 0              | 0              | N              | N/A              |
| 4                 | M                   | Previous       | Current                     | Primary   | Oropharynx  | Tonsil                | 3              | 2b             | 0              | N              | +                |
| 5                 | F                   | Never          | Current                     | Primary   | Hypopharynx | X                     | 3              | 1              | 1              | N              | N/A              |
| 6                 | M                   | Never          | Never                       | Primary   | Oral        | Tongue                | 4              | 2a             | 0              | N              | N/A              |
| 7                 | M                   | Previous       | Current                     | Primary   | Oral        | Tongue                | 1              | 1              | 0              | Y              | N/A              |
| 8                 | M                   | Current        | Current                     | Primary   | Oral        | Floor of mouth        | 2              | 2b             | 0              | N              | N/A              |
| 9                 | F                   | Previous       | Never                       | Primary   | Oral        | Floor of mouth        | 2              | 2c             | 0              | N              | N/A              |
| 10                | M                   | Current        | Current                     | Primary   | Oral        | Tongue                | 3              | 0              | 0              | N              | N/A              |
| 11                | M                   | Current        | Current                     | Primary   | Oral        | Tongue                | 1              | 0              | 0              | N              | N/A              |
| 12                | F                   | Never          | Current                     | Primary   | Oral        | Mandible              | 4a             | 0              | 0              | Y              | N/A              |
| 13                | F                   | Current        | Current                     | Primary   | Oral        | Mandible              | 1              | 0              | 0              | N              | N/A              |
| 14                | F                   | Current        | Current                     | Primary   | Oral        | Tongue                | 4              | 0              | 0              | N              | +                |
| 15                | M                   | Previous       | Previous                    | Primary   | Oral        | Mandible              | 4a             | 2b             | 0              | N              | -                |
| 16                | M                   | Previous       | Previous                    | Primary   | Larynx      | X                     | 4a             | 0              | 0              | N              | N/A              |
| 17                | M                   | Current        | Previous                    | Recurrent | Oropharynx  | Tonsil                | 2              | 0              | 0              | Y              | -                |
| 18                | M                   | Never          | Previous                    | Primary   | Larynx      | X                     | 4a             | 1              | 0              | N              | N/A              |
| 19                | F                   | Never          | Current                     | Primary   | Oral        | Tongue                | 2              | 0              | 0              | Y              | X                |
| 20                | M                   | Current        | Current                     | Primary   | Oral        | Tongue                | 4a             | 2b             | 0              | N              | -                |
| 21                | M                   | Current        | Current                     | Primary   | Oral        | Floor of mouth        | 2              | 2c             | 0              | N              | X                |
| 22                | M                   | Current        | Current                     | Primary   | Oropharynx  | Tonsil                | X              | X              | X              | N              | X                |
| 23                | F                   | Current        | Current                     | Primary   | Oropharynx  | Tongue base           | 4a             | 0              | 0              | N              | -                |
| 24                | M                   | Never          | Current                     | Primary   | Oropharynx  | Tonsil                | 2              | 2c             | 0              | N              | +                |

<sup>a</sup> Abbreviations: F, female; M, male

<sup>b</sup> Abbreviations: X, no data available

<sup>c</sup> Abbreviations: X, no data available, N/A, not applicable

<sup>d</sup> T stage. Abbreviations: X, no data available; 1, tumour ≤ 2 cm; 2, tumour > 2 cm; 3, tumour > 4 cm; 4a, moderately advanced local disease; 4b, very advanced local disease

<sup>e</sup> N stage. Abbreviations: X, no data available; 0, No regional lymph node metastasis; 1, Metastasis in a single ipsilateral lymph node ≤ 3 cm in greatest dimension; 2a, Metastasis in a single ipsilateral lymph node > 3 cm but not more than 6 cm in greatest dimension; 2b, Metastasis in a multiple ipsilateral lymph nodes - none > 6 cm in greatest dimension; 2c, Metastasis in bilateral or contralateral lymph nodes - none > 6 cm in greatest dimension; 3, Metastasis in a lymph node > 6 cm in greatest dimension

<sup>f</sup> M stage. Abbreviations: X, no data available; 0, no distant metastasis; 1, distant metastasis

<sup>g</sup> Tumour recurrence. Abbreviations: 0, no; 1, yes

<sup>h</sup> p16 status determined by immunohistochemistry. Abbreviations: X, no data available; N/A, not applicable; -, negative; +, positive

<sup>‡</sup> Normal specimens were taken at least 3 cm from the tumour margin and histologically examined to confirm tissue was non-cancerous

## Supplementary Table S2

| Case <sup>†</sup> | Age at Diagnosis (yr) | Gender <sup>a</sup> | Smoking status <sup>b</sup> | Alcohol status <sup>c</sup> | Site       | Sub-site <sup>d</sup> | T <sup>e</sup> | N <sup>f</sup> | M <sup>g</sup> | R <sup>h</sup> | HPV status <sup>i</sup> |
|-------------------|-----------------------|---------------------|-----------------------------|-----------------------------|------------|-----------------------|----------------|----------------|----------------|----------------|-------------------------|
| 1                 | 62                    | F                   | Previous                    | Previous                    | Oropharynx | Tonsil                | 2              | 0              | 0              | N              | -                       |
| 2                 | 57                    | F                   | N/A                         | N/A                         | Oropharynx | Tonsil                | 2              | 2a             | 0              | N              | +                       |
| 3                 | 50                    | F                   | Current                     | Current                     | Oropharynx | Base of tongue        | 4              | 2a             | 0              | N              | -                       |
| 4                 | 56                    | M                   | Previous                    | N/A                         | Oropharynx | X                     | 1              | 1              | 0              | Y              | -                       |
| 5                 | 57                    | M                   | Current                     | Previous                    | Oropharynx | Tonsil                | 3              | 2a             | 0              | X              | -                       |
| 6                 | 49                    | F                   | Never                       | Previous                    | Oropharynx | Tonsil                | 2              | 1              | 0              | Y              | +                       |
| 7                 | 57                    | M                   | Never                       | Previous                    | Oropharynx | Base of tongue        | 4              | 0              | 0              | N              | +                       |
| 8                 | 42                    | M                   | Never                       | Previous                    | Oropharynx | Tonsil                | 2              | 2b             | 0              | N              | +                       |
| 9                 | 48                    | M                   | Current                     | Current                     | Oropharynx | Base of tongue        | 4              | 2b             | 0              | N              | -                       |
| 10                | 72                    | M                   | Current                     | Never                       | Oropharynx | Soft palate           | 2              | 0              | 0              | N              | -                       |
| 11                | 51                    | F                   | Previous                    | Previous                    | Oropharynx | X                     | 4              | 0              | 0              | N              | -                       |
| 12                | 51                    | M                   | Current                     | Current                     | Oropharynx | Soft palate           | 4              | 0              | 0              | Y              | -                       |
| 13                | 52                    | M                   | Never                       | Current                     | Oropharynx | Tonsil                | 4              | 0              | 0              | N              | +                       |
| 14                | 54                    | M                   | Never                       | Previous                    | Oropharynx | Tonsil                | 2              | 0              | 0              | Y              | +                       |
| 15                | 47                    | F                   | Current                     | Previous                    | Oropharynx | Tonsil                | 1              | 0              | 0              | Y              | -                       |
| 16                | 51                    | M                   | Previous                    | Previous                    | Oropharynx | X                     | 4              | 0              | 0              | N              | -                       |
| 17                | 51                    | M                   | Never                       | Previous                    | Oropharynx | Tonsil                | 2              | 2c             | 0              | N              | +                       |
| 18                | 70                    | M                   | Previous                    | Previous                    | Oropharynx | Base of tongue        | 4              | 2a             | 0              | N              | -                       |
| 19                | 45                    | M                   | Current                     | Current                     | Oropharynx | Soft palate           | 2              | 2c             | 0              | N              | -                       |
| 20                | 67                    | F                   | Current                     | Previous                    | Oropharynx | Tonsil                | 2              | 2b             | 0              | N              | -                       |
| 21                | 46                    | F                   | Never                       | Previous                    | Oropharynx | Tonsil                | 2              | 1              | 0              | N              | -                       |
| 22                | 56                    | F                   | Current                     | Previous                    | Oropharynx | Base of tongue        | 4              | 0              | 0              | N              | -                       |
| 23                | 59                    | M                   | Previous                    | Previous                    | Oropharynx | Tonsil                | 2              | 0              | 0              | N              | +                       |
| 24                | 51                    | M                   | Never                       | Previous                    | Oropharynx | Base of tongue        | 2              | 2a             | 0              | N              | +                       |
| 25                | 48                    | M                   | Never                       | Previous                    | Oropharynx | Tonsil                | 1              | 2a             | 0              | N              | -                       |
| 26                | 40                    | M                   | Previous                    | Never                       | Oropharynx | Base of tongue        | 2              | 2b             | 0              | N              | -                       |
| 27                | 66                    | M                   | Previous                    | Current                     | Oropharynx | Base of tongue        | 2              | 2b             | 0              | Y              | +                       |
| 28                | 66                    | M                   | Previous                    | Previous                    | Oropharynx | Base of tongue        | 3              | 0              | 0              | N              | -                       |
| 29                | 45                    | M                   | Never                       | Previous                    | Oropharynx | Tonsil                | X              | 3              | 0              | N              | +                       |
| 30                | 57                    | F                   | Current                     | Previous                    | Oropharynx | Tonsil                | 1              | 1              | 0              | N              | +                       |
| 31                | 62                    | M                   | Current                     | Previous                    | Oropharynx | Base of tongue        | 4              | 2              | X              | N              | -                       |
| 32                | 58                    | M                   | Current                     | N/A                         | Oropharynx | Tonsil                | 3              | 0              | X              | N              | -                       |
| 33                | 57                    | F                   | Never                       | Previous                    | Oropharynx | Base of tongue        | 3              | 2b             | 0              | N              | -                       |
| 34                | 46                    | M                   | Previous                    | Previous                    | Oropharynx | Tonsil                | 2              | 2a             | X              | N              | +                       |
| 35                | 41                    | M                   | Previous                    | Previous                    | Oropharynx | Tonsil                | 3              | 2              | 0              | N              | -                       |
| 36                | 75                    | F                   | Previous                    | Previous                    | Oropharynx | Soft palate           | 2              | 0              | 0              | Y              | -                       |
| 37                | 67                    | M                   | Current                     | Previous                    | Oropharynx | Tonsil                | 3              | 1              | 0              | N              | -                       |
| 38                | 72                    | M                   | N/A                         | Previous                    | Oropharynx | Base of tongue        | 2              | 3              | X              | Y              | -                       |
| 39                | 56                    | M                   | Previous                    | Previous                    | Oropharynx | Tonsil                | 2              | 3              | X              | Y              | -                       |
| 40                | 55                    | M                   | Never                       | Previous                    | Oropharynx | Base of tongue        | 2              | 2              | 0              | Y              | -                       |
| 41                | 50                    | M                   | Never                       | Previous                    | Oropharynx | Tonsil                | 3              | 2b             | 0              | N              | -                       |
| 42                | 51                    | M                   | Current                     | Current                     | Oropharynx | Tonsil                | 3              | 2b             | X              | N              | -                       |
| 43                | 53                    | M                   | Current                     | Previous                    | Oropharynx | Base of tongue        | 3              | 1              | X              | Y              | -                       |
| 44                | 45                    | F                   | Current                     | Current                     | Oropharynx | Soft palate           | 3              | 2c             | X              | N              | -                       |
| 45                | 51                    | M                   | Current                     | Current                     | Oropharynx | Soft palate           | 1              | 0              | 0              | Y              | -                       |
| 46                | 66                    | M                   | Never                       | Current                     | Oropharynx | Base of tongue        | 1              | 3              | X              | Y              | -                       |
| 47                | 56                    | M                   | Current                     | Previous                    | Oropharynx | Tonsil                | 2              | 0              | 0              | N              | NA                      |
| 48                | 58                    | F                   | Previous                    | Previous                    | Oropharynx | Tonsil                | 1              | 0              | 0              | N              | NA                      |
| 49                | 62                    | M                   | Current                     | Previous                    | Oropharynx | Soft palate           | 2              | 0              | 0              | N              | -                       |
| 50                | 53                    | M                   | Current                     | Previous                    | Oropharynx | Piriform              | 2              | 1              | X              | N              | -                       |
| 51                | 74                    | M                   | Current                     | Never                       | Oropharynx | Tonsil                | 3              | 2c             | X              | N              | -                       |
| 52                | 64                    | M                   | Current                     | Previous                    | Oropharynx | Tonsil                | X              | X              | X              | N              | -                       |
| 53                | 46                    | M                   | Previous                    | X                           | Oropharynx | Base of tongue        | X              | X              | X              | Y              | -                       |

<sup>a</sup> Abbreviations: F, female; M, male

<sup>b</sup> Abbreviations: N/A, not applicable

<sup>c</sup> Abbreviations: X, no data available, N/A, not applicable

<sup>d</sup> Abbreviations: X, no data available

<sup>e</sup> T stage. Abbreviations: X, no data available; 1, tumour ≤ 2 cm; 2, tumour > 2 cm; 3, tumour > 4 cm; 4a, moderately advanced local disease; 4b, very advanced local disease

<sup>f</sup> N stage. Abbreviations: X, no data available; 0, No regional lymph node metastasis; 1, Metastasis in a single ipsilateral lymph node ≤ 3 cm in greatest dimension; 2a, Metastasis in a single ipsilateral lymph node > 3 cm but not more than 6 cm in greatest dimension; 2b, Metastasis in a multiple ipsilateral lymph nodes - none > 6 cm in greatest dimension; 2c, Metastasis in bilateral or contralateral lymph nodes - none > 6 cm in greatest dimension; 3, Metastasis in a lymph node > 6 cm in greatest dimension

<sup>g</sup> M stage. Abbreviations: X, no data available; 0, no distant metastasis; 1, distant metastasis

<sup>h</sup> Tumour recurrence. Abbreviations: N, no; Y, yes

<sup>i</sup> HPV status determined by in-situ hybridisation histochemistry. Abbreviations: X, no data available; N/A, not applicable; -, negative; +, positive

<sup>†</sup>Tissue microarrays (TMA) were prepared with HNSCC specimens from 53 patients who underwent surgery at the University Hospitals Coventry and Warwickshire NHS Trust, UK or the Royal Liverpool and Broadgreen University Hospitals NHS Trust, UK

### **Supplementary Table S3. Characteristics of HNSCC cell lines**

| Cell line  | Patient details |                     |         |         | Clinical features   |                |                    |            |
|------------|-----------------|---------------------|---------|---------|---------------------|----------------|--------------------|------------|
|            | Age             | Gender <sup>a</sup> | Smoking | Alcohol | Origin <sup>b</sup> | Site           | Pathological stage | TP53 codon |
| 92-VU-040T | 65              | F                   | -       | -       | NP                  | Tongue         | T3N0               | WT         |
| 93-VU-147T | 58              | M                   | +       | +       | NP                  | Floor of mouth | T4N2               | c.770T>G   |

<sup>a</sup> Abbreviations: F, female; M, male.

<sup>b</sup> Abbreviations: NP, new primary.

<sup>c</sup>92-VU-040T cells are a moderately differentiated HPV-negative HNSCC line derived from biopsies of a primary squamous cell carcinoma of the oral cavity (tongue) of a 65 year-old female patient and expresses wild-type p53 (1-4). Synonym: VU-SCC-040. [https://web.expasy.org/cellosaurus/CVCL\\_JL62](https://web.expasy.org/cellosaurus/CVCL_JL62) (5)

<sup>d</sup>93-VU-147T cells are a moderately differentiated HNSCC line, which was derived from biopsies of a primary squamous cell carcinoma of the oral cavity (floor of mouth) of a 58 year-old male patient (1-4). The cells contain a heterozygous mutation in the TP53 gene (c.770T>G, p.L257R) predicted to render the translated p53 protein non-functional (6). The cells also contain integrated HPV-16 DNA (1-4). Synonym: VU-SCC-047. [https://web.expasy.org/cellosaurus/CVCL\\_L895](https://web.expasy.org/cellosaurus/CVCL_L895) (5).

#### **References**

1. Hermsen M A, Joenje H, Arwert F, Welters M J, Braakhuis B J, Bagnay M, et al. Centromeric breakage as a major cause of cytogenetic abnormalities in oral squamous cell carcinoma. *Genes Chromosomes Cancer* 1996;15:1-9
2. White J S, Weissfeld J L, Ragin C C, Rossie K M, Martin C L, Shuster M, et al. The influence of clinical and demographic risk factors on the establishment of head and neck squamous cell carcinoma cell lines. *Oral Oncol* 2007;43:701-12
3. Steenbergen R D, Hermsen M A, Walboomers J M, Joenje H, Arwert F, Meijer C J, et al. Integrated human papillomavirus type 16 and loss of heterozygosity at 11q22 and 18q21 in an oral carcinoma and its derivative cell line. *Cancer Res* 1995;55:5465-71
4. Rampias T, Sasaki C, Weinberger P, and Psyrrri A. E6 and E7 gene silencing and transformed phenotype of human papillomavirus 16-positive oropharyngeal cancer cells. *J Natl Cancer Inst* 2009;101:412-23
5. Bairoch A. The Cellosaurus: a cell line knowledge resource. <https://web.expasy.org/cellosaurus/>
6. Kimple R J, Smith M A, Blitzer G C, Torres A D, Martin J A, Yang R Z, et al. Enhanced radiation sensitivity in HPV-positive head and neck cancer. *Cancer Res* 2013;73:4791-800

**Supplementary Table S4.** shRNA sequences used in lentiviral vectors.

| <b>shRNA sequences<sup>1</sup></b> |                                   |
|------------------------------------|-----------------------------------|
| <b>ID</b>                          | <b>Sequence</b>                   |
| PBF shRNA#1                        | 5' GAT CAT CAC CAT GTC GGT A 3'   |
| PBF shRNA#2                        | 5' AAC GCT AAC TGC ACA CGAA 3'    |
| PBF shRNA#3                        | 5' GGT TGT GAA ATA CAG CGT A 3'   |
| PTTG shRNA#1                       | 5' GGT CTG GAC CTT CAA TCA AAG 3' |
| PTTG shRNA#2                       | 5' GCC TTA CCT AAA GCT ACT AGA 3' |

<sup>1</sup>Preliminary screening showed that PTTG shRNA#1 and PBF shRNA#1 gave the greatest knockdown in HNSCC cells (PTTG shRNA#1: ~90%; PBF shRNA#1: ~80%). Based on these results cells transduced with either PTTG or PBF shRNA#1 were expanded and antibiotic-resistant colonies selected to provide a genetically homogenous and clonal cell population. In addition, cells lentivirally transduced with Scrambled (Scr) shRNA, which contains a scrambled sequence with no known homology to human sequences, were also expanded.

**Supplementary Table S5.** Primary antibodies used in study.

| <b>Commercial Taqman Assays</b> |                                       |                           |
|---------------------------------|---------------------------------------|---------------------------|
| <b>Antibody</b>                 | <b>Clone</b>                          | <b>Supplier</b>           |
| PBF                             | Rabbit polyclonal; Custom             | Eurogentec                |
| PBF-pY174                       | Rabbit monoclonal; Custom             | Covalab                   |
| PTTG                            | Mouse monoclonal 1gG2 [DCS-280]       | Abcam                     |
| PTTG-pT60 <sup>1,2</sup>        | Rabbit monoclonal; Custom             | Covalab                   |
| H2A.X S139P                     | Mouse monoclonal [JBW301] [16-193]    | Millipore                 |
| HA <sup>3</sup>                 | Mouse monoclonal 1gG1 [16B12]         | BioLegend                 |
| HA <sup>4</sup>                 | Rabbit polyclonal [Y-11] [sc-805]     | Santa Cruz Biotechnology  |
| p53                             | Mouse monoclonal IgG2 [DO-1] [sc-126] | Santa Cruz Biotechnology  |
| p53 <sup>5</sup>                | Rabbit polyclonal [FL-393] [sc-6243]  | Santa Cruz Biotechnology  |
| p53 pS15                        | Rabbit polyclonal [9284]              | Cell Signaling Technology |
| β-actin                         | Mouse monoclonal [AC-15]              | Sigma-Aldrich             |

<sup>1</sup>T60 phospho-specific PTTG antibody was produced by CovalAb using three peptides; CUK-1323A long phospho-peptide: FDAPPALPKATpRKAL, CUK-1323B short phospho-peptide: LPKATpRKA, and CUK-1323C control peptide: FDAPPALPKATRKAL. Both CUK-1323A and B were used for immunisations to obtain antibodies specific to the phospho-modification. The serum was then purified against the control peptide to remove non-specific antibodies and against CUK-1323B to retain only specific antibodies. The antibody was then immunopurified from serum.

<sup>2</sup>For peptide blocking experiments, the phospho-specific PTTG-T60 antibody was incubated with a two-fold excess of neutralising peptide (supplied by CovalAb) for 2 hours with gentle shaking prior to incubation with Western blot membrane or HNSCC tissue section. Densitometry was performed for Western blot analysis as previously described (Read ML *et al.*, 2014).

<sup>3</sup>Anti-HA antibody used to detect exogenous expression of HA-tagged PTTG (e.g. Fig. 5A and C; Supplementary Fig. S10B) and PBF (e.g. Fig. 5B and D) in whole cell lysates.

<sup>4,5</sup>Anti-HA and p53 antibodies used to validate successful immunoprecipitation in co-IP assays (e.g. Supplementary Fig. S10A and S10C).

| <b>Commercial Taqman Assays</b> |                         |
|---------------------------------|-------------------------|
| <b>Gene target</b>              | <b>Catalogue Number</b> |
| <i>PBF</i>                      | Hs01036322_m1           |
| <i>PTTG</i>                     | Hs00851754_u1           |
| <i>TP53</i>                     | Hs01034249_m1           |
| <i>CDKN1A</i>                   | Hs00355782_m1           |
| <i>BCL2</i>                     | Hs00248075_m1           |
| <i>RAD51</i>                    | Hs00947967_m1           |
| <i>BRCA1</i>                    | Hs01556193_m1           |
| <i>PPIA</i>                     | Hs04194521_s1           |

**Supplementary Table S6.** List of Taqman<sup>®</sup> assays (ThermoFisher Scientific) used in study. PPIA was used as internal control. Relative expression was calculated using the  $2^{-\Delta\Delta C_t}$  method.

**Supplementary Table S7.** p53 mutational status of tumour samples in HNSCC TCGA with profiled HPV status.

| Subsite     | HPV status | TCGA samples per subgroup | Mutation data available <sup>1</sup> | MUT p53 <sup>2</sup> | WT p53 <sup>3</sup> |
|-------------|------------|---------------------------|--------------------------------------|----------------------|---------------------|
| Larynx      | -ve        | 18                        | 17                                   | 17(100%)             | 0(0)                |
|             | +ve        | 3                         | 2                                    | 2(100%)              | 0(0)                |
| Oral Cavity | -ve        | 45                        | 44                                   | 35(79.5%)            | 9(20.5%)            |
|             | +ve        | 2                         | 1                                    | 1(100%)              | 0(0)                |
| Oropharynx  | -ve        | 8                         | 8                                    | 8(100%)              | 0(0)                |
|             | +ve        | 32                        | 28                                   | 1(3.6%)              | 27(96.4%)           |

<sup>1</sup>Total number of HNSCC samples with profiled HPV status and corresponding p53 mutation data available in TCGA. Data corresponds to Supplementary Fig. S2D-S2E.

<sup>2</sup>Number of HNSCC tumours with mutant p53. Alterations include missense mutations, truncating mutation and deep deletions. Percentages in brackets.

<sup>3</sup>Number of HNSCC tumours with wild-type p53. Percentage in brackets.

**Supplementary Table S8**

| Clinical and pathological features |                  | PTTG                       |                    |             |                     |
|------------------------------------|------------------|----------------------------|--------------------|-------------|---------------------|
|                                    |                  | Mann-Whitney <i>U</i> test |                    |             | Fisher's exact test |
|                                    |                  | No. of patients            | H-score (mean±SEM) | p-value     | p-value             |
| <b>Age (yr)</b>                    | <50              | 13                         | 37.9±11.0          | 0.21        | 1.00                |
|                                    | >50              | 38                         | 61.0±9.4           |             |                     |
| <b>Gender<sup>a</sup></b>          | F                | 14                         | 34.9±7.7           | 0.23        | 0.20                |
|                                    | M                | 37                         | 62.7±9.9           |             |                     |
| <b>Smoking status</b>              | Never            | 14                         | 76.8±14.8          | 0.07        | 0.12                |
|                                    | Previous/Current | 35                         | 47.0±9.1           |             |                     |
| <b>Alcohol status</b>              | Never            | 3                          | 76.7±43.2          | 0.49        | 0.55                |
|                                    | Previous/Current | 44                         | 52.9±7.9           |             |                     |
| <b>Sub-site</b>                    | Tonsil           | 25                         | 59.3±10.2          | 0.67        | 0.75                |
|                                    | Base of tongue   | 15                         | 59.7±17.2          |             |                     |
| <b>T stage</b>                     | pT1-2            | 29                         | 54.4±8.7           | 0.99        | 0.37                |
|                                    | pT3-4            | 19                         | 62.7±15.3          |             |                     |
| <b>N stage</b>                     | pN0-1            | 23                         | 70.0±14.2          | 0.39        | 0.78                |
|                                    | pN2-3            | 26                         | 46.1±7.2           |             |                     |
| <b>Recurrence</b>                  | No               | 36                         | 57.8±8.0           | 0.34        | 0.76                |
|                                    | Yes              | 14                         | 51.7±18.9          |             |                     |
| <b>HPV status<sup>b</sup></b>      | -                | 36                         | 44.2±8.7           | <b>0.05</b> | <b>0.05</b>         |
|                                    | +                | 13                         | 82.0±15.8          |             |                     |

<sup>a</sup> Abbreviations: F, female; M, male

<sup>b</sup> Abbreviations: -, negative; +, positive



**Supplementary Table S9<sup>1</sup>**

| Gene | MUT p53 Subgroup v WT p53 (n = 157) | N   | $P_L$                 | $P_B$                 | $P_T$                 | Median Survival v WT p53 (68.43 months) |
|------|-------------------------------------|-----|-----------------------|-----------------------|-----------------------|-----------------------------------------|
| PBF  | HIGH (Q3Q4)                         | 180 | 5.39x10 <sup>-4</sup> | 1.50x10 <sup>-4</sup> | 1.17x10 <sup>-4</sup> | 32.19                                   |
|      | LOW (Q1Q2)                          | 180 | 0.016                 | 0.046                 | 0.021                 | 46.98                                   |
|      | HIGH (Q4)                           | 90  | 0.0012                | 5.48x10 <sup>-4</sup> | 4.19x10 <sup>-4</sup> | 32.19                                   |
|      | LOW (Q1)                            | 90  | 0.017                 | NS                    | 0.029                 | 49.41                                   |
| PTTG | HIGH (Q3Q4)                         | 180 | 4.88x10 <sup>-4</sup> | 8.36x10 <sup>-4</sup> | 3.26x10 <sup>-4</sup> | 32.62                                   |
|      | LOW (Q1Q2)                          | 180 | 0.017                 | 0.011                 | 0.0053                | 47.93                                   |
|      | HIGH (Q4)                           | 90  | 0.0032                | 0.0147                | 0.0053                | 35.51                                   |
|      | LOW (Q1)                            | 90  | NS                    | NS                    | NS                    | 52.27                                   |

<sup>1</sup>Expression groups Q3Q4 and Q1Q2, as well as Q1 and Q4, compared for both PTTG and PBF in MUT p53 versus WT p53 HNSCC tumours. In all cases the significant difference in overall survival was greater with high expression groups (i.e. Q3Q4 or Q4) for PBF and PTTG than corresponding low expression groups (i.e. Q1Q2 and Q1) in MUT p53 versus WT p53 tumours. *P*-values were determined using the indicated test (L=Log Rank, B=Breslow, T=Tarone-Ware). Median survival times were also shorter in all high expression groups (i.e. Q3Q4 or Q4) compared to corresponding low expression groups.
